# Supplementary material for: Glucose-6-phosphate dehydrogenase alleviates epileptic seizures by repressing reactive oxygen species production to promote signal transducer and activator of transcription 1-mediated N-methyl-d-aspartic acid receptors inhibition
Source: PubMed Central journal article supplement — Redox Biol. 2024 Jun 11;74:103236. doi: 10.1016/j.redox.2024.103236 (PMC11225908; doi:10.1016/j.redox.2024.103236), 2024-06-11

**Figure 1a**

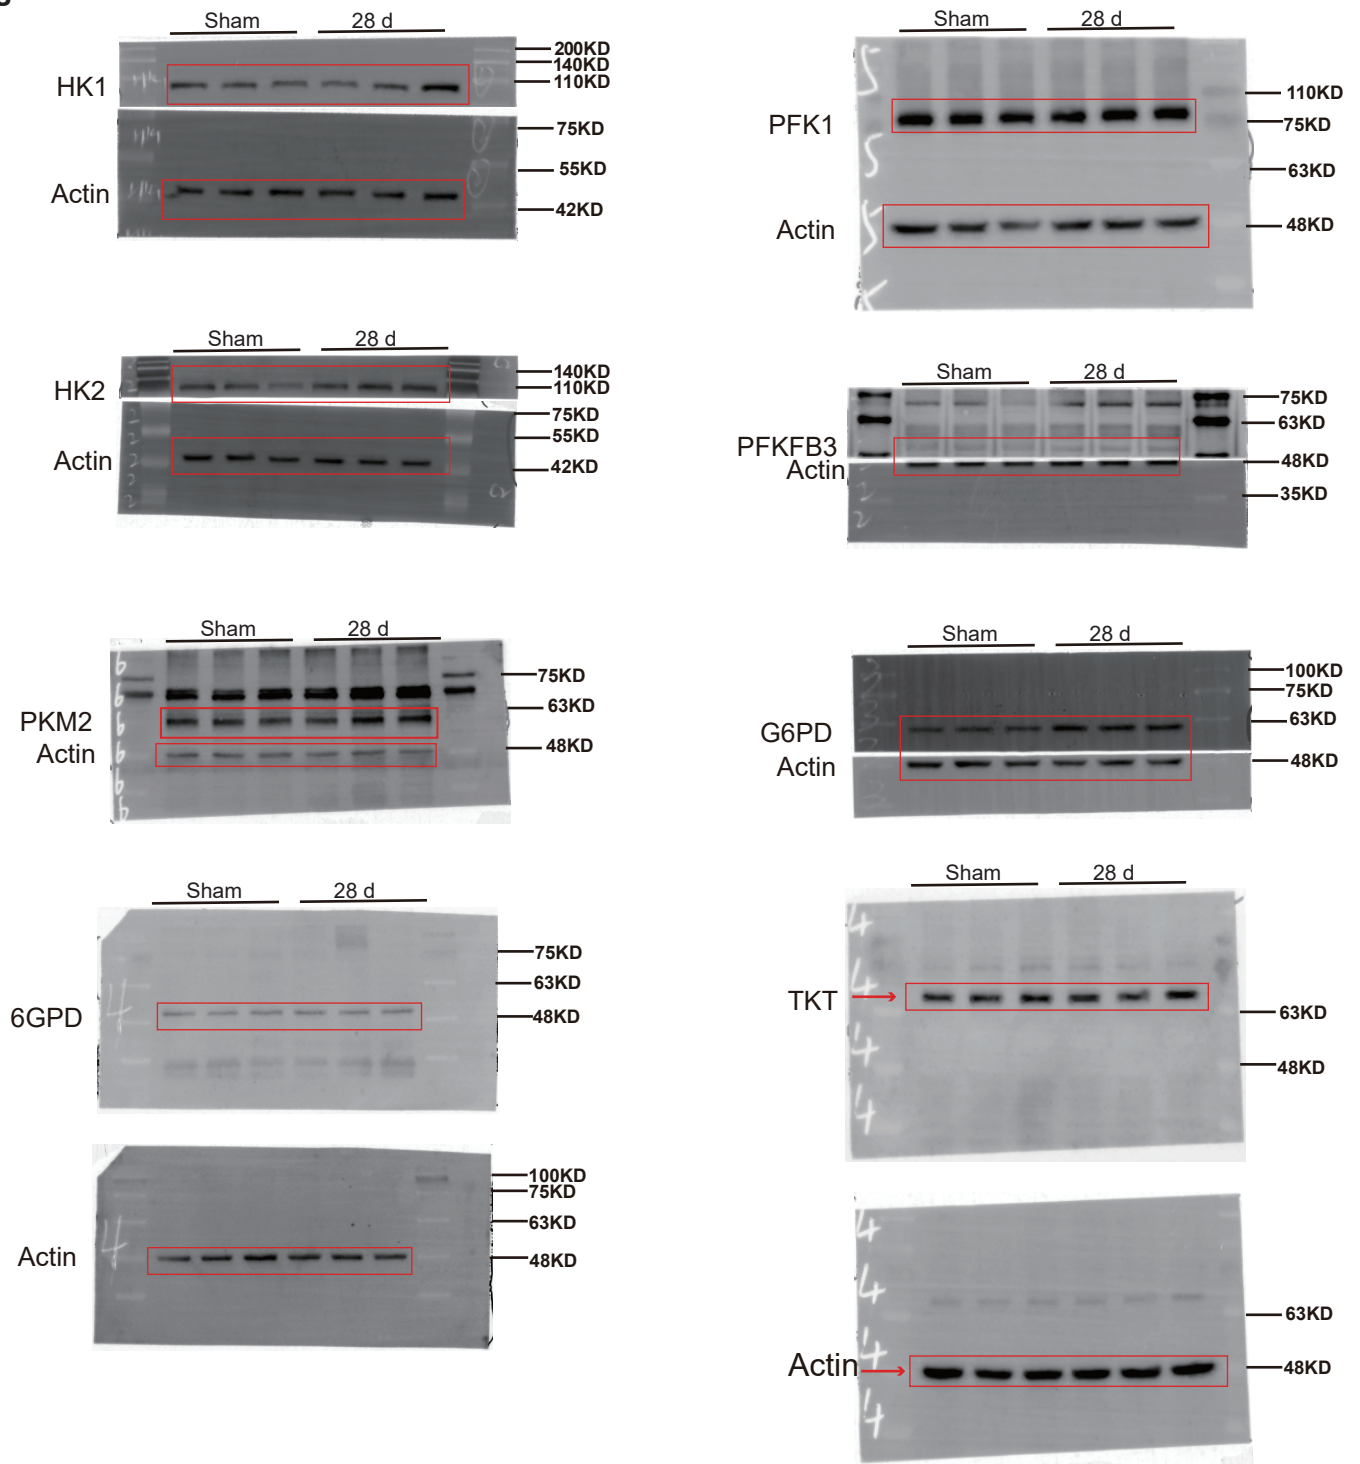

**Figure 1c**

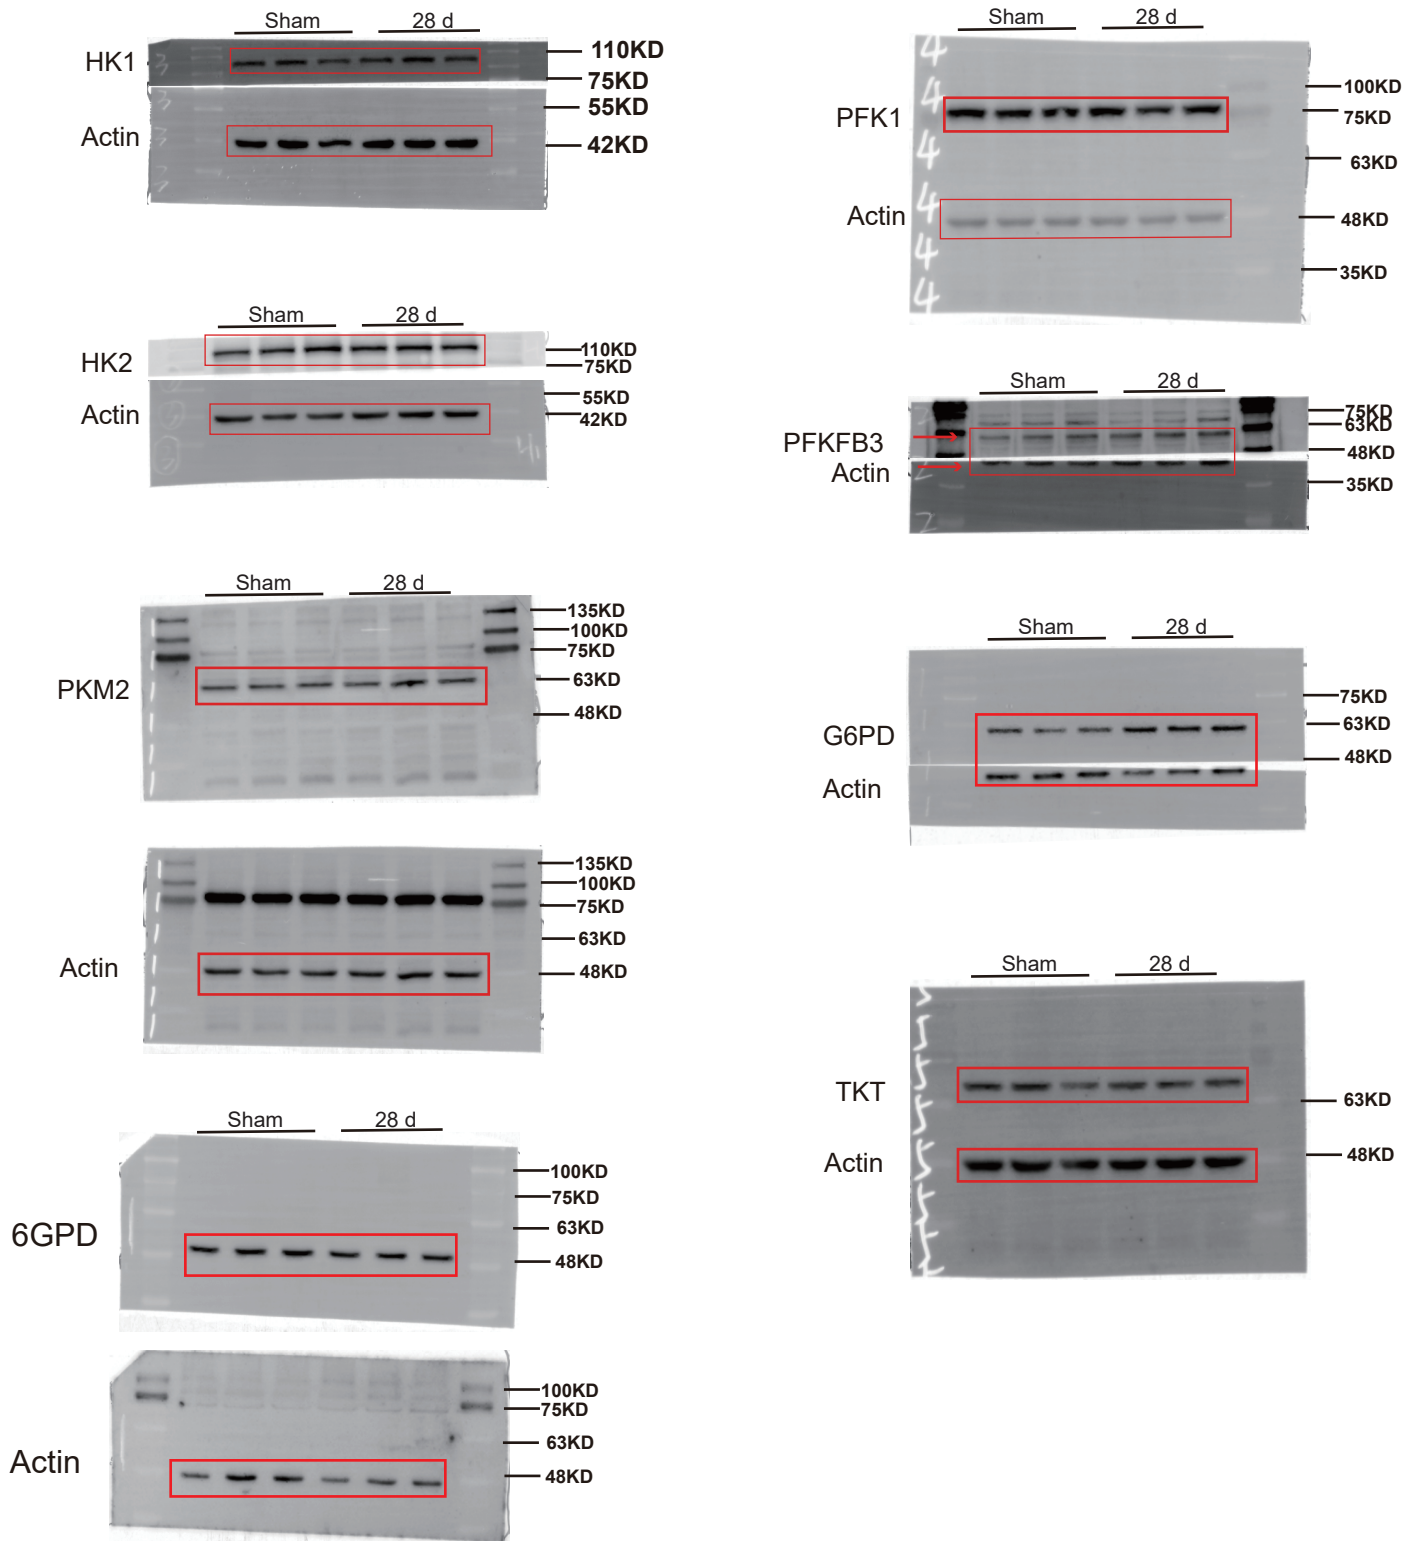

**Figure 3b**

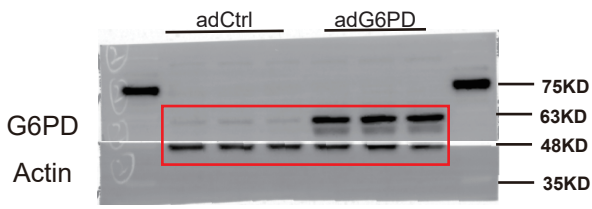

**Figure 4b**

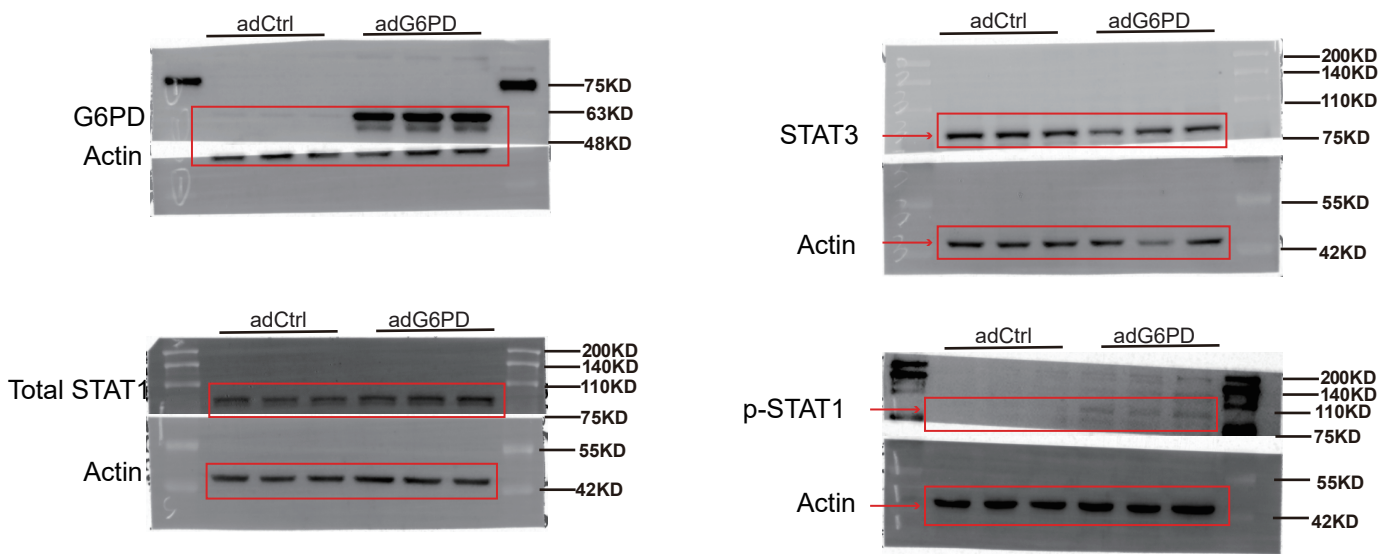

**Figure 4d**

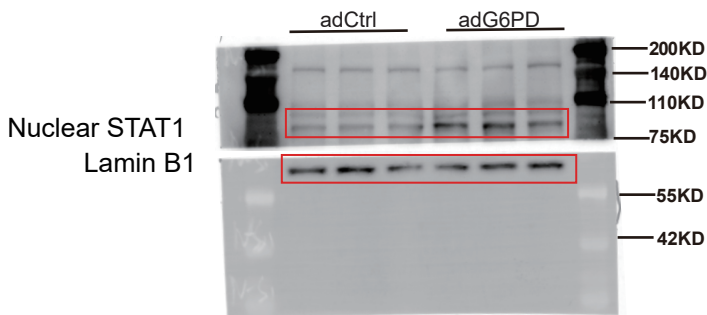

**Figure 4f**

Total protein

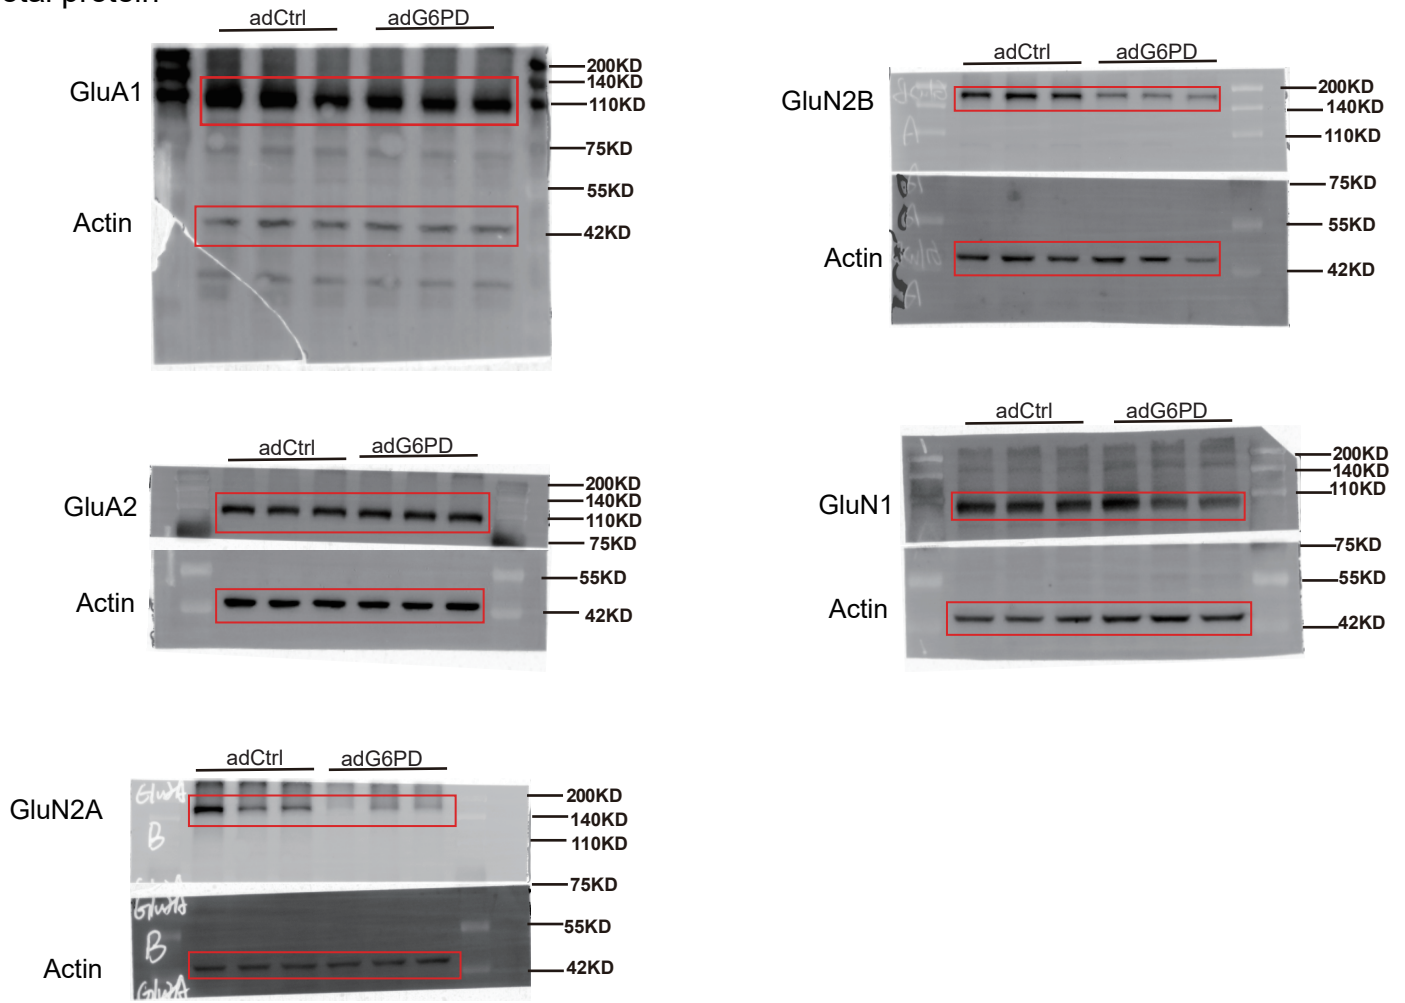

**Figure 4h**

Surface protein

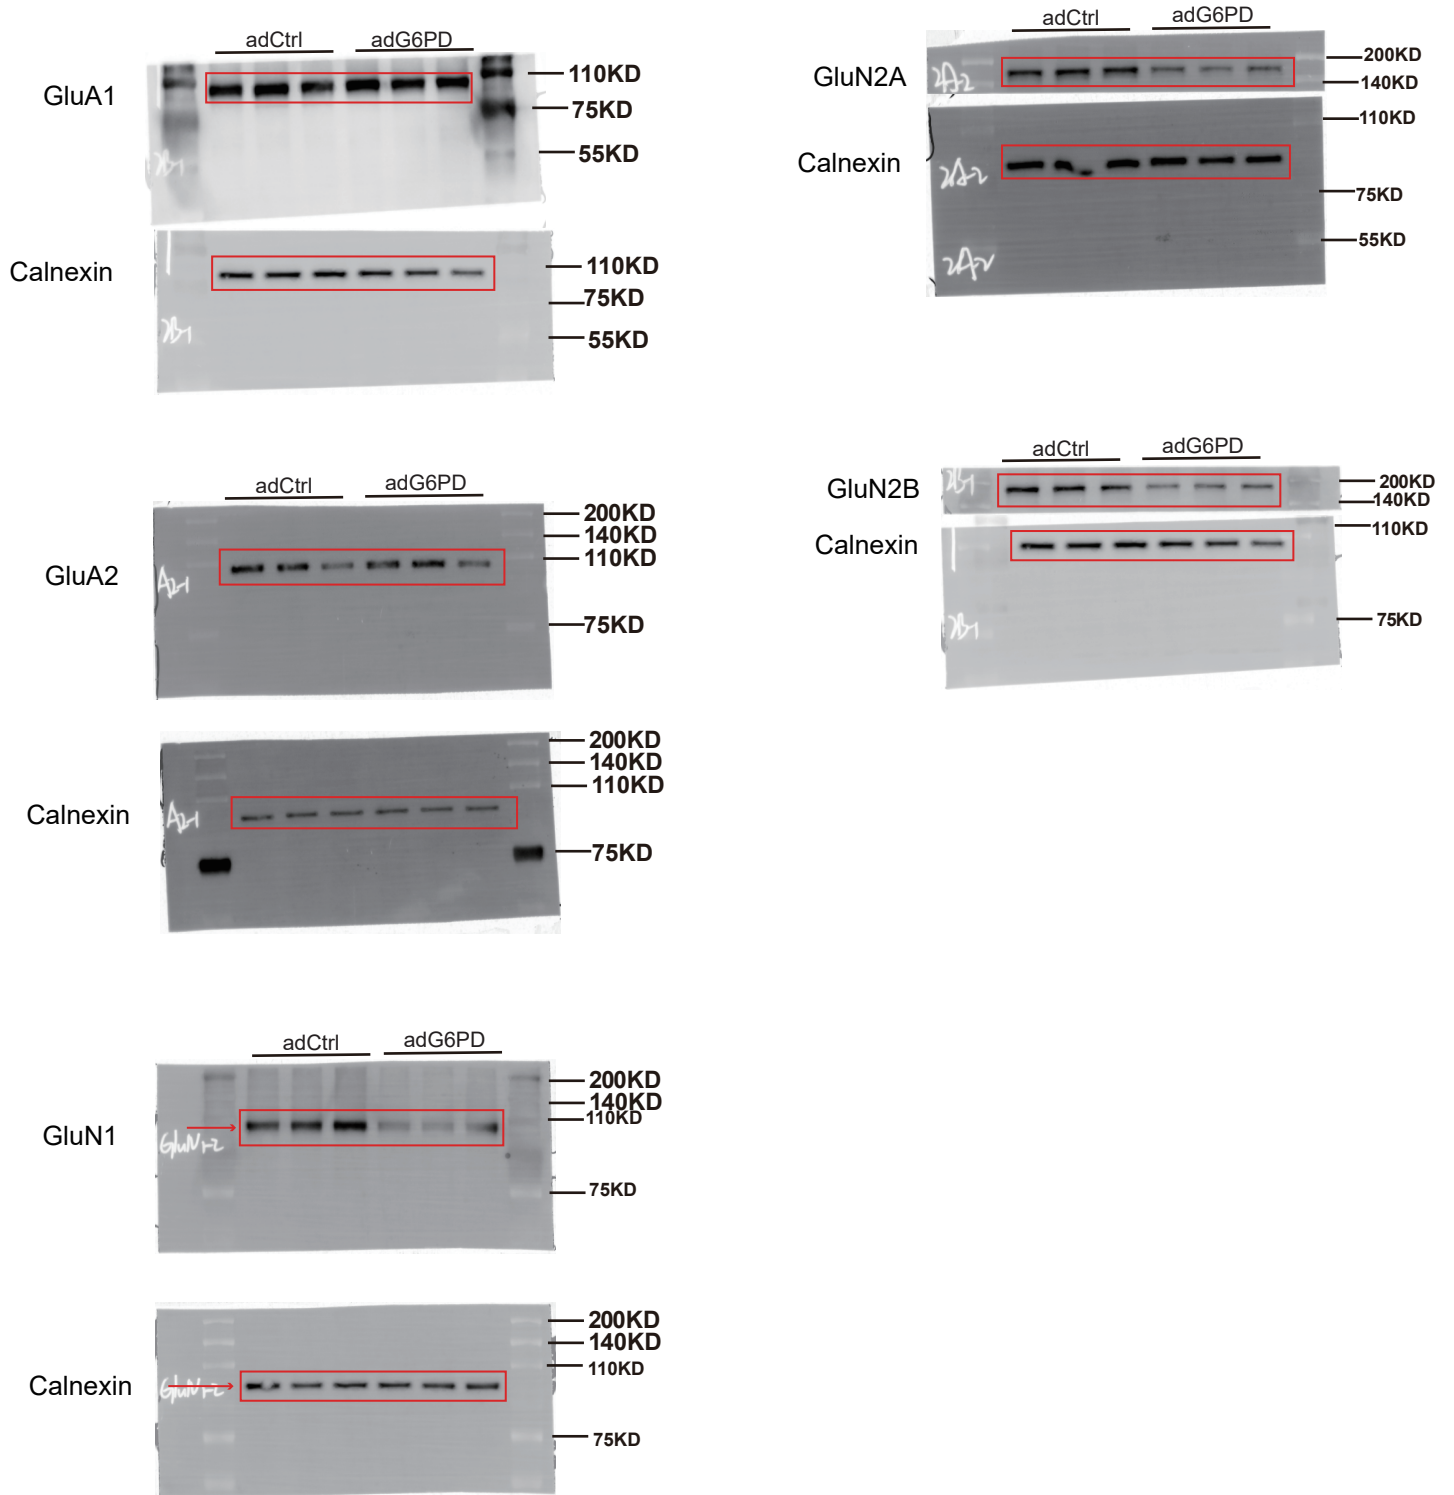

**Figure 4k**

Total protein

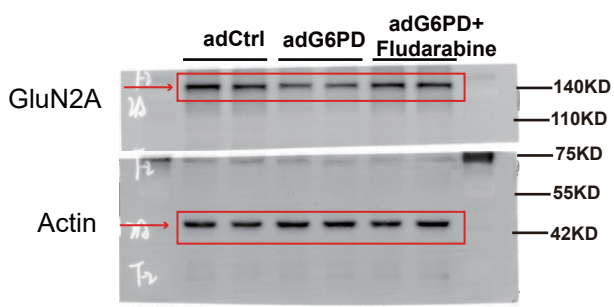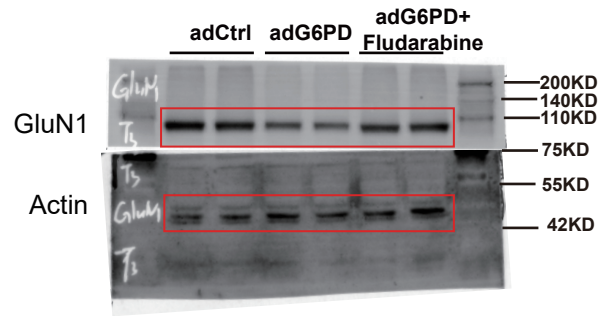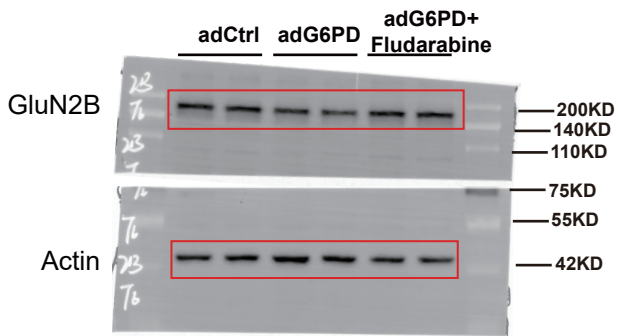

**Figure 5i**

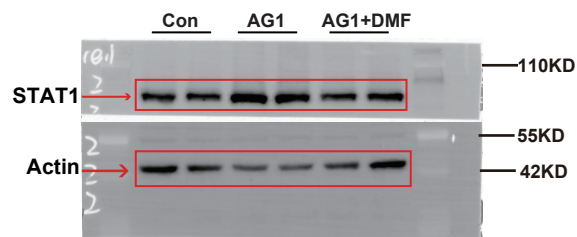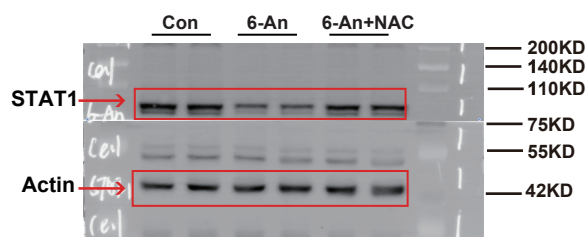

**Figure 6b**

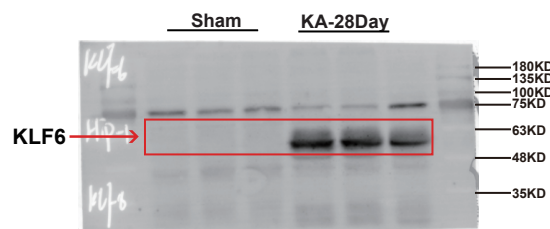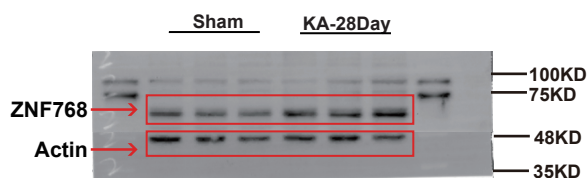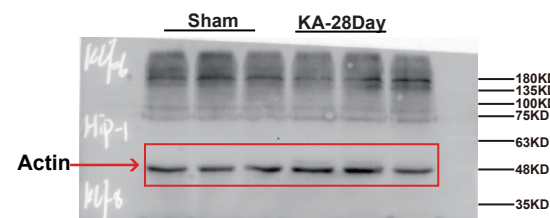

**Figure 7f**

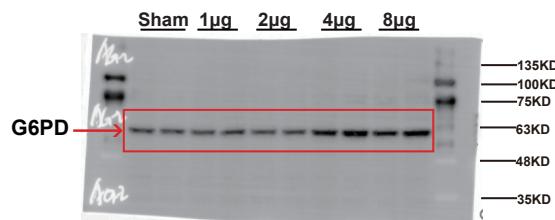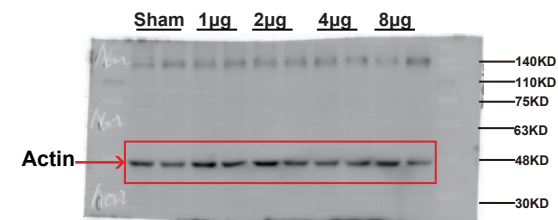

Supplement: mmc2.pdf [file mmc2.pdf]
