# Supplementary material for: Glucose-6-phosphate dehydrogenase alleviates epileptic seizures by repressing reactive oxygen species production to promote signal transducer and activator of transcription 1-mediated N-methyl-d-aspartic acid receptors inhibition
Source: PubMed Central journal article supplement — Redox Biol. 2024 Jun 11;74:103236. doi: 10.1016/j.redox.2024.103236 (PMC11225908; doi:10.1016/j.redox.2024.103236), 2024-06-11
Supplement: mmc3.pdf [file mmc3.pdf]

**Table 1. Article Information and change request**

|                                                              |                                                                                                                                          |
|--------------------------------------------------------------|------------------------------------------------------------------------------------------------------------------------------------------|
| <b>Article title</b>                                         | G6PD alleviates epileptic seizures via repressing ROS production to promote STAT1-mediated NMDARs inhibition.                            |
| <b>Journal title</b>                                         | Redox Biology                                                                                                                            |
| <b>Submission ID or DOI</b>                                  | REDOX-D-24-01526                                                                                                                         |
| <b>Provide a brief explanation for the changes requested</b> | We propose adding Prof. Xin Tian as the second co-corresponding author. Prof. Xin Tian is currently listed as the second-to-last author. |

Table 2. Provide the complete and correct author list, in order, as it should appear on the article.

| Author Name |             | Corr. author (Y/N) | Institutional affiliation                                 | Email address          | Signature        | Date       |
|-------------|-------------|--------------------|-----------------------------------------------------------|------------------------|------------------|------------|
| Given Name  | Family Name |                    |                                                           |                        |                  |            |
| Liqin       | Hu          | N                  | First Affiliated Hospital of Chongqing Medical University | 13452539665@163.com    | Liqin Hu         | 2024.06.06 |
| Yan         | Liu         | N                  | First Affiliated Hospital of Chongqing Medical University | 2452250609@qq.com      | Yan Liu          | 2024.06.06 |
| Ziwei       | Yuan        | N                  | First Affiliated Hospital of Chongqing Medical University | g_yziwei@163.com       | g-yziwei@163.com | 2024.06.06 |
| Haokun      | Guo         | N                  | First Affiliated Hospital of Chongqing Medical University | 422202015@qq.com       | Haokun Guo       | 2024.06.06 |
| Ran         | Duan        | N                  | First Affiliated Hospital of Chongqing Medical University | randuan820@163.com     | Ran Duan         | 2024.06.06 |
| Pingyang    | Ke          | N                  | First Affiliated Hospital of Chongqing Medical University | kepingyang2015@163.com | Pingyang Ke      | 2024.06.06 |
| Yuan        | Meng        | N                  | First Affiliated Hospital of Chongqing Medical University | mengyuan98@foxmail.com | Yuan Meng        | 2024.06.06 |
| Xin         | Tian        | Y                  | First Affiliated Hospital of Chongqing Medical University | xintian@cqmu.edu.cn    | Xin Tian         | 2024.06.06 |
| Fei         | Xiao        | Y                  | First Affiliated Hospital of Chongqing Medical University | feixiao81@126.com      | Fei Xiao         | 2024.06.06 |
